# Supplementary material for: Characterization of the Cultivable Endophytic Bacterial Community of Seeds and Sprouts of Cannabis sativa L. and Perspectives for the Application as Biostimulants
Source: MDPI journal article supplement (doi:10.3390/microorganisms10091742), 2022-08-29
Supplement: s1 [file s1]

## Supplementary material

**Table S1.** Resume of the taxonomic and phenotypic characterization of the bacterial isolates. Columns indicate in order: Strain name, haplotype, Taxonomic attribution (NCBI), quantification of IAA production, results of the growth in presence of stress conditions, and row values of halos in disk diffusion assay against seeds extract and solvent (EtOH 80%).

|         |           |                             |                  |                                    | Results of the growth under stress conditions, expressed for each test as the % of growth with respect to the control (bacterial inoculum in MHB medium). The % values are calculated on the bases of the measured absorbances, as described in materials and methods. |                            |         |              |                                       | Row values of halo measures (mm) in the disk diffusion assay against the seeds extracts. Tests showing no halo (complete resistance) are indicated with the number 6, that correspond to the diameter of the disk, and was used to normalize the data in the matrix used for the heatmap construction (Fig. 3) |          |                        |                       |                       |                       |
|---------|-----------|-----------------------------|------------------|------------------------------------|------------------------------------------------------------------------------------------------------------------------------------------------------------------------------------------------------------------------------------------------------------------------|----------------------------|---------|--------------|---------------------------------------|----------------------------------------------------------------------------------------------------------------------------------------------------------------------------------------------------------------------------------------------------------------------------------------------------------------|----------|------------------------|-----------------------|-----------------------|-----------------------|
| Strain  | Haplotype | Taxonomy                    | Isolation source | mg IAA/1.5 x 10 <sup>8</sup> cells | Pen 5 µg mL <sup>-1</sup>                                                                                                                                                                                                                                              | Strp 1 µg mL <sup>-1</sup> | NaCl 2% | PEG 6000 15% | H <sub>2</sub> O <sub>2</sub> 0.0025% | Strp (10 µg)                                                                                                                                                                                                                                                                                                   | EtOH 80% | 10 mg mL <sup>-1</sup> | 4 mg mL <sup>-1</sup> | 2 mg mL <sup>-1</sup> | 1 mg mL <sup>-1</sup> |
| Can_S1  | A         | Staphylococcus epidermidis  | Seeds            | 0.005902                           | 90.5                                                                                                                                                                                                                                                                   | >100                       | >100    | 13.4         | 5.8                                   | 20                                                                                                                                                                                                                                                                                                             | 9        | 10                     | 10.5                  | 11.5                  | 10.5                  |
| Can_S2  | A         | Staphylococcus epidermidis  | Seeds            | 0.150492                           | >100                                                                                                                                                                                                                                                                   | >100                       | 76.7    | 19.9         | 3.9                                   | 19                                                                                                                                                                                                                                                                                                             | 10       | 7                      | 9.5                   | 8                     | 9.5                   |
| Can_S3  | B         | Kocuria rhizophyla          | Seeds            | 0.28623                            | 9.5                                                                                                                                                                                                                                                                    | 31.1                       | 6.7     | 48.7         | 6.8                                   | 23.5                                                                                                                                                                                                                                                                                                           | 7        | 9                      | 7                     | 8                     | 9                     |
| Can_S4  | C         | Staphylococcus epidermidis  | Seeds            | 0.032459                           | >100                                                                                                                                                                                                                                                                   | >100                       | >100    | 15.7         | 5.1                                   | 19.5                                                                                                                                                                                                                                                                                                           | 9        | 10                     | 10.5                  | 10                    | 8.5                   |
| Can_S5  | C         | Staphylococcus epidermidis  | Seeds            | 0.059016                           | 5.1                                                                                                                                                                                                                                                                    | 95.4                       | 5.4     | 10.4         | 18.5                                  | 26.5                                                                                                                                                                                                                                                                                                           | 8        | 7                      | 10                    | 7                     | 9                     |
| Can_S6  | C         | Staphylococcus epidermidis  | Seeds            | 0.056066                           | 98.9                                                                                                                                                                                                                                                                   | 99.5                       | 82.5    | 16.6         | 4.7                                   | 19.5                                                                                                                                                                                                                                                                                                           | 10.5     | 10                     | 11.5                  | 10.5                  | 11.5                  |
| Can_S7  | C         | Staphylococcus epidermidis  | Seeds            | 0.315738                           | 5.9                                                                                                                                                                                                                                                                    | 93.8                       | 4.9     | 8.6          | 7.0                                   | 22.5                                                                                                                                                                                                                                                                                                           | 8.5      | 6                      | 10                    | 9.5                   | 10                    |
| Can_S8  | C         | Staphylococcus epidermidis  | Seeds            | 0.050164                           | 83.6                                                                                                                                                                                                                                                                   | 93.3                       | >100    | 28.7         | 4.2                                   | 20                                                                                                                                                                                                                                                                                                             | 8        | 11                     | 10.5                  | 10.5                  | 8.5                   |
| Can_S9  | B         | Kocuria rhizophyla          | Seeds            | 0.197705                           | 19.9                                                                                                                                                                                                                                                                   | 79.3                       | 19.2    | 55.1         | 21.2                                  | 20.5                                                                                                                                                                                                                                                                                                           | 8        | 6                      | 8                     | 8                     | 8                     |
| Can_S10 | D         | Stenotrophomonas rhizophyla | Seeds            | 0.224262                           | 93.2                                                                                                                                                                                                                                                                   | 85.4                       | 46.0    | 45.1         | 4.3                                   | 6                                                                                                                                                                                                                                                                                                              | 8.5      | 6                      | 9                     | 10                    | 11                    |
| Can_S11 | F         | Sphingomonas areolata       | Seeds            | 2.103934                           | 32.8                                                                                                                                                                                                                                                                   | >100                       | 33.3    | 71.6         | 41.1                                  | 6                                                                                                                                                                                                                                                                                                              | 10       | 8                      | 7                     | 9.5                   | 10.5                  |

|         |   |                               |                 |          |      |      |      |      |      |      |     |     |     |     |     |
|---------|---|-------------------------------|-----------------|----------|------|------|------|------|------|------|-----|-----|-----|-----|-----|
| Can_S12 | E | Bacillus aryabhattai          | Seeds           | 0.165246 | 8.0  | 84.8 | 8.5  | 18.0 | 41.5 | 23   | 8.5 | 6   | 7   | 7.5 | 8   |
| Can_S13 | E | Bacillus aryabhattai          | Seeds           | 0.129836 | 9.2  | 10.0 | 9.1  | 12.1 | 7.3  | 23   | 7   | 9   | 6   | 9   | 8.5 |
| Can_S14 | D | Stenotrophomonas rhizophyla   | Seeds           | 0.227213 | 94.9 | 91.3 | 25.7 | 39.7 | 5.2  | 8.5  | 9   | 10  | 12  | 9   | 8   |
| Can_S15 | D | Stenotrophomonas rhizophyla   | Seeds           | 0.247869 | >100 | 95.2 | 53.0 | 42.7 | 4.3  | 10.5 | 12  | 7   | 10  | 10  | 10  |
| Can_S16 | G | Paenibacillus amylolyticus    | Seeds           | 0.64623  | 13.5 | >100 | >100 | 19.7 | 10.0 | 6    | 6   | 6   | 6   | 6   | 6   |
| Can_S17 | B | Kocuria rhizophyla            | Seeds           | 0.498689 | 20.6 | 88.2 | 18.5 | 39.2 | 15.0 | 20   | 8   | 12  | 8   | 7.5 | 7.5 |
| Can_S18 | F | Sphingomonas areolata         | Seeds           | nd       | 42.0 | 84.6 | 26.1 | 46.1 | 21.5 | 6    | 8.5 | 10  | 10  | 8   | 8   |
| Can_S21 | H | Curtobacterium flaccumfaciens | Seeds           | 0.33177  | <0   | 90.6 | 87.7 | 6.0  | <0   | 29   | 6   | 6   | 6   | 6   | 6   |
| Can_S24 | I | Cellulomonas hominis          | Seeds           | 0.878168 | <0   | 88.1 | >100 | 19.3 | <0   | 11.5 | 6   | 6   | 6   | 6   | 6   |
| Can_S25 | I | Cellulomonas hominis          | Seeds           | 0.540105 | <0   | 92.5 | >100 | 20.3 | <0   | 11   | 6   | 6   | 6   | 6   | 6   |
| Can_S26 | I | Cellulomonas hominis          | Seeds           | 0.343681 | 20.3 | 96.2 | >100 | 19.1 | 0.1  | 10   | 6   | 6   | 6   | 6   | 6   |
| Can_S27 | L | Cellulomonas hominis          | Seeds           | 0.515476 | 75.2 | 98.2 | >100 | 7.2  | 0.3  | 17.5 | 6   | 6   | 6   | 6   | 6   |
| Can_S28 | M | Psychrobacillus psychrodurans | Seeds           | 1.096118 | <0   | >100 | <0   | 40.5 | 0.4  | 29   | 6   | 6   | 6   | 6   | 6   |
| GI2     | N | Staphylococcus haemolyticus   | 2-weeks sprouts | 0.029405 | 0.1  | 99.3 | 90.6 | 7.7  | 0.7  | 19.5 | 8   | 7.7 | 7   | 7.7 | 7.3 |
| GI3     | N | Staphylococcus haemolyticus   | 2-weeks sprouts | 0.057657 | 0.4  | >100 | >100 | 5.0  | 3.3  | 23   | 8.3 | 7.7 | 7   | 7   | 7   |
| GI4     | N | Staphylococcus haemolyticus   | 2-weeks sprouts | 0.017038 | 17.4 | 90.1 | 94.1 | 4.8  | 2.1  | 18.5 | 9.7 | 7.3 | 7.7 | 8.3 | 8.3 |
| GR1     | N | Staphylococcus haemolyticus   | 2-weeks sprouts | 0.003698 | 0.6  | 51.9 | 98.7 | 6.4  | 1.3  | 14.5 | 8.3 | 7.3 | 7   | 7   | 7.3 |
| GR2     | N | Staphylococcus haemolyticus   | 2-weeks sprouts | 0.035271 | 1.2  | 98.1 | 92.7 | 7.4  | 2.3  | 15   | 8.7 | 7.7 | 7.7 | 7   | 8.3 |
| GR4     | N | Staphylococcus haemolyticus   | 2-weeks sprouts | 0.035132 | <0   | 32.6 | 87.4 | 6.6  | 1.2  | 20.5 | 8.3 | 7   | 7   | 7   | 7.3 |
